# Supplementary material
Source: Springer Nature journal article supplement (https://www.springermedizin.de/resource/supplementary/12936_2011_2032_MOESM2_ESM.pdf/9543388)

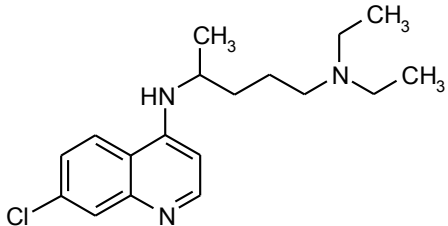

**Chloroquine**

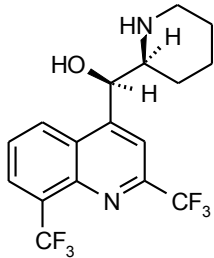

**(+)-Mefloquine-enantiomer  
(+)-(11*R*, 12*S*)**

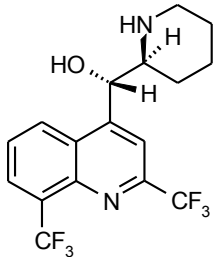

**(-)-Mefloquine-enantiomer  
(-)-(11*S*, 12*R*)**

Supplement: MOESM2 [file 9543388]
